# Supplementary material
Source: HighWire-hosted journal article supplement (https://www.cmajopen.ca/highwire/filestream/80867/field_highwire_adjunct_files/2/open-2015-0061-3-at.pdf)
Supplement: open-2015-0061-3-at.pdf [file open-2015-0061-3-at.pdf]

**Appendix 3 (as supplied by the authors): Methodological quality evaluation: tool for studies of prognostic test (adapted from QUADAS-2 and REMARK)**

| Domain                                               | Patient Selection                                                                                                                                       | Prognostic markers                                                                                                                                 | Outcome                                                                                                                                                                                                                     | Flow                                                                                                                                                                          | Timing                                                                                                                       | Confounding                                                   |
|------------------------------------------------------|---------------------------------------------------------------------------------------------------------------------------------------------------------|----------------------------------------------------------------------------------------------------------------------------------------------------|-----------------------------------------------------------------------------------------------------------------------------------------------------------------------------------------------------------------------------|-------------------------------------------------------------------------------------------------------------------------------------------------------------------------------|------------------------------------------------------------------------------------------------------------------------------|---------------------------------------------------------------|
| Description                                          | Describe methods of patient selection<br><br>Describe included patients (previous testing, presentation, intended use of index test, and setting)       | Describe the prognostic marker and how it was conducted and interpreted                                                                            | Describe the outcome measurement and how it was conducted and interpreted                                                                                                                                                   | Describe any patients who did not have the prognostic markers measured or for whom outcome was not measured or who were excluded from the 2 X 2 table (refer to flow diagram) | Describe the interval and any interventions between prognostic markers and the outcome measurement                           | Describe any method used to control for potential confounding |
| Signaling questions (yes, no, or unclear)            | Was a consecutive or random sample of patients enrolled?<br><br>Was a case-control design avoided?<br><br>Did the study avoid inappropriate exclusions? | Were the prognostic marker results interpreted without knowledge of clinical data? (blinding)<br><br>If a threshold was used, was it prespecified? | Was the outcome measurement adequate?<br><br>Did all patients have their outcome evaluated the same way?<br><br>Were the outcome results interpreted without knowledge of the results of the prognostic markers? (blinding) | Did all patients have outcome measured?<br><br>Were all patients included in the analysis? (lost to follow-up? withdrawal? patients not tested? missing data? etc.)           | Was there an appropriate interval between prognostic marker and outcome measurement? (sufficient time for outcome to occur?) | Did the study control for potential confounders?              |
| Risk of bias (high, low, or unclear)                 | Could the selection of patients have introduced bias?                                                                                                   | Could the conduct or interpretation of the prognostic marker have introduced bias?                                                                 | Could the outcome measurement, its conduct, or its interpretation have introduced bias?                                                                                                                                     | Could the patient flow have introduced bias?                                                                                                                                  | Could the timing have introduced bias?                                                                                       | Confusion bias?                                               |
| Concerns about applicability (high, low, or unclear) | Are there concerns that the included patients do not match the review question?                                                                         | Are there concerns that the prognostic marker, its conduct, or its interpretation differ                                                           | Are there concerns that the outcome measure does not match the review                                                                                                                                                       |                                                                                                                                                                               |                                                                                                                              |                                                               |

Appendix to: Mercier E, Boutin A, Shemilt M, et al. Predictive value of neuron-specific enolase for prognosis in patients with moderate or severe traumatic brain injury: a systematic review and meta-analysis. *CMAJ Open* 2016. DOI:10.9778/cmajo.20150061. Copyright © 2016 The Author(s) or their employer(s).

To receive this resource in an accessible format, please contact us at [cmajgroup@cmaj.ca](mailto:cmajgroup@cmaj.ca).

|  |  |                           |                                                                                                                         |  |  |  |
|--|--|---------------------------|-------------------------------------------------------------------------------------------------------------------------|--|--|--|
|  |  | from the review question? | question?<br>(not clearly reported according to prognostic marker results or different dichotomisation of scales, etc.) |  |  |  |
|--|--|---------------------------|-------------------------------------------------------------------------------------------------------------------------|--|--|--|
